# Supplementary material for: Progesterone suppresses the invasion and migration of breast cancer cells irrespective of their progesterone receptor status - a short report
Source: Springer Nature journal article supplement (doi:10.1007/s13402-017-0330-z), 2017-06-26

## **Progesterone Suppresses Invasion and Migration of Breast Cancer Cells Independent of Progesterone Receptor**

Mukul Godbole<sup>1,2</sup>, Kanishka Tiwary<sup>1</sup>, Rajendra Badwe<sup>3\*</sup>, Sudeep Gupta<sup>4\*</sup>, Amit Dutt<sup>1,2\*</sup>

1- Integrated Genomics Laboratory, Advanced Centre for Treatment, Research and Education In Cancer, Tata Memorial Centre, Navi Mumbai- 410210, India.

2- Homi Bhabha National Institute, Training School Complex, Anushakti Nagar, Mumbai, India

3- Department of Surgical Oncology, Tata Memorial Hospital, Tata Memorial Centre, Mumbai- 400012, India.

4- Department of Medical Oncology, Tata Memorial Centre, Mumbai- 400012, India.

\* To whom correspondence should be addressed: Amit Dutt [adutt@actrec.gov.in](mailto:adutt@actrec.gov.in); Sudeep Gupta [sudeep.gupta@actrec.gov.in](mailto:sudeep.gupta@actrec.gov.in); Rajendra Badwe [badwera@tmc.gov.in](mailto:badwera@tmc.gov.in)

## **Figure Captions**

### **Supplementary Fig 1 Differentially phosphorylated kinases in response to progesterone treatment of breast cancer cells**

The figure represents X-ray films exposed to nitrocellulose membrane for 5min with untreated and progesterone-treated lysates from **a)** T47D and **b)** MDA-MB-231 cells. Black lines and numbers on the right of the spots indicate the location of differentially phosphorylated kinases in untreated and progesterone-treated sets for both cells. The annotation of the spots is as follows:

- 1- p38 $\alpha$ ; 2- ERK1/2; 3- EGFR; 4- MSK1/2; 5- AKT1/2/3; 6- Fgr; 7- FAK; 8- p70S6K;
- 9- p27; 10- STAT3; 11- RSK1/2/3; 12- PLC- $\gamma$ 1.

### **Supplementary Fig 2 Progesterone suppresses phosphorylation of kinases involved in cell migration and invasion in breast cancer cells by up-regulating *DUSP1***

**a)** Western blot analysis of p-EGFR (Y1086), p-AKT (S473) and p-ERK1/2 (T202/Y204) was performed in T47D and MDA-MB-231 (MD231) cells treated with progesterone. Total protein for each phospho-kinase was also probed. Numbers on blot indicate ratio of intensity of phosphorylation for each kinase with respect to its total protein levels.  $\beta$ -actin was used as internal loading control.  $\beta$ -actin for the p-ERK1/2 and p-EGFR panels is the same. “-” indicates control while “+” indicates progesterone treatment. **b)** Real-time PCR analysis of *DUSP1* was performed in breast cancer cells treated with progesterone. Graph has been plotted as fold-change for *DUSP1* with respect to *GAPDH* for control and progesterone-treated cells; horizontal black line indicates expression of *DUSP1* in control cells. Figure is representative of three independent experiments performed in triplicates. *P*-value was calculated using student's unpaired t-test. \*\* indicates *P*-value <0.001; \*\*\* indicates *P*-value <0.0001.

### **Supplementary Fig 3 Mifepristone antagonizes the effect of progesterone on cell migration**

**a)** T47D and **b)** MDA-MB-231 cells were treated with alcohol (control), progesterone, mifepristone and mifepristone+progesterone for 20hrs and followed for time-lapse cellular migration assay. Bar plots indicate percentage cellular migration of the cells, with a comparison between control and progesterone; mifepristone and mifepristone+progesterone; and progesterone and mifepristone+progesterone treated cells. Figures are representative of three independent experiments performed in triplicates. *P*-value was calculated using student's unpaired t-test. \*\* indicates *P*-value <0.001; \*\*\* indicates *P*-value <0.0001.

# Supplementary Fig 1

a

T47D  
(PR+/ER+/Her2-)

Untreated

Progesterone

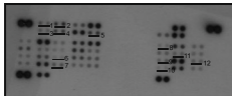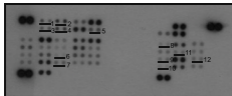

b

MDA-MB-231  
(PR-/ER-/Her2-)

Untreated

Progesterone

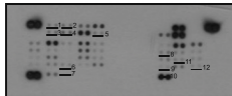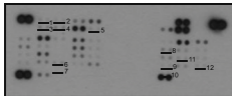

Supplementary Fig 2

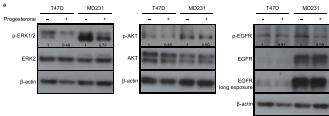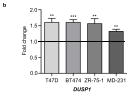

### Supplementary Fig 3

**a**

**T47D**  
(PR+/ER+/Her2-)

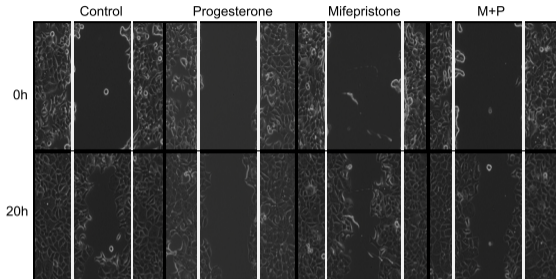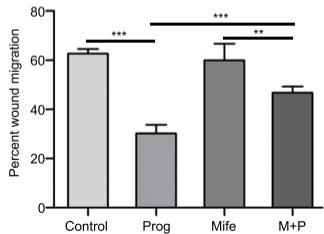

**b**

**MDA-MB-231**  
(PR-/ER-/Her2-)

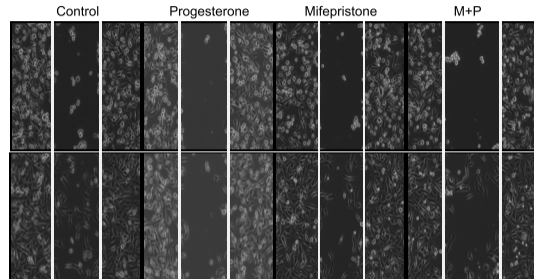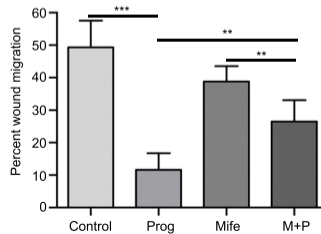

Supplement: MOESM1 [file 12477094]
